# Supplementary material for: Prolyl 4‐Hydroxylase Domain Protein 3 Overexpression Improved Obstructive Sleep Apnea—Induced Cardiac Perivascular Fibrosis Partially by Suppressing Endothelial‐to‐Mesenchymal Transition
Source: PubMed Central journal article supplement — J Am Heart Assoc. 2017 Oct 19;6(10):e006680. doi: 10.1161/JAHA.117.006680 (PMC5721870; doi:10.1161/jaha.117.006680), 2017-10-19

# **SUPPLEMENTAL MATERIAL**

## Supplemental Figure Legends:

**Figure S1. Basic characteristic of mice. (A)** weight of mice. **(B)** systolic blood pressure.

Data are mean±SD; n=10 per group. \* $p < 0.05$  vs Control.

**Figure S2. Change of PHD3 expression in vivo and vitro by lentivirus transfection**

**(A)** Western blot analysis of PHD3 protein level relative to that of  $\beta$ -actin (a1) and quantitative analysis(a2) in vivo. **(B)** Representative photograph of GFP-labeled scramble transfection efficiency in HUVECs by fluorescence microscopy; the transfection efficiency was evaluated at more than 90% (original magnification  $\times 100$  bar=50 $\mu$ m). **(C)** Western blot analysis of PHD3 protein level relative to that of  $\beta$ -actin (c1) and quantitative analysis(c2) in vitro. Data are mean±SD; n=10 per group. \* $p < 0.05$  vs shNC or # $p < 0.05$  vs LvNC.

**Figure S3. Masson and collagen I III staining in myocardium region** Representative

images of the heart section with Masson's trichrome (blue staining), and immunohistochemical staining of collagen I collagen III (yellow staining) for each group. (original magnification  $\times 400$  bars=20 $\mu$ m).

**Figure S4. PHD3 overexpression improve IH-induced EndMT.** Representative images of immunohistochemical staining of  $\alpha$ -SMA (yellow staining) in the perivascular and vascular region. The presence of  $\alpha$ -SMA is detected in endothelial cells (red arrows)(original magnification  $\times 400$  bars=20 $\mu$ m).

Figure S1.

**A**

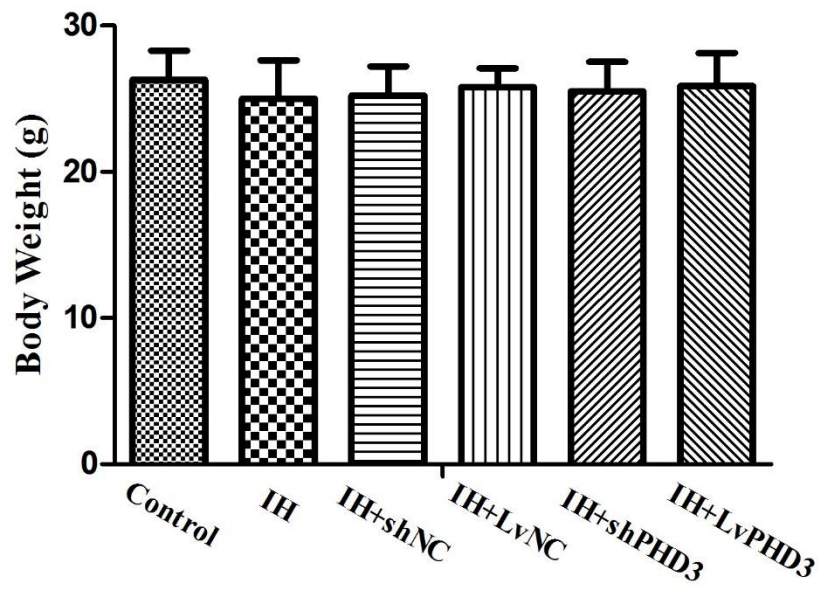

**B**

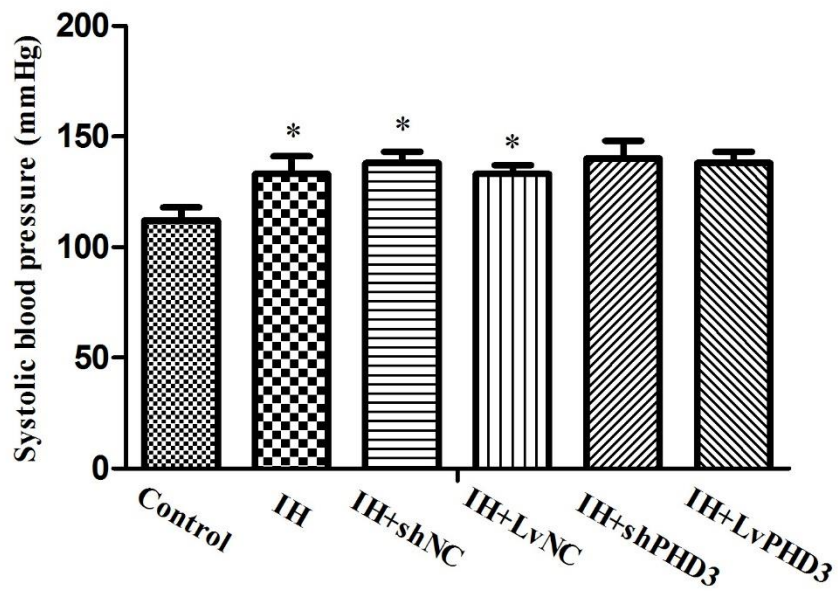

Figure S2.

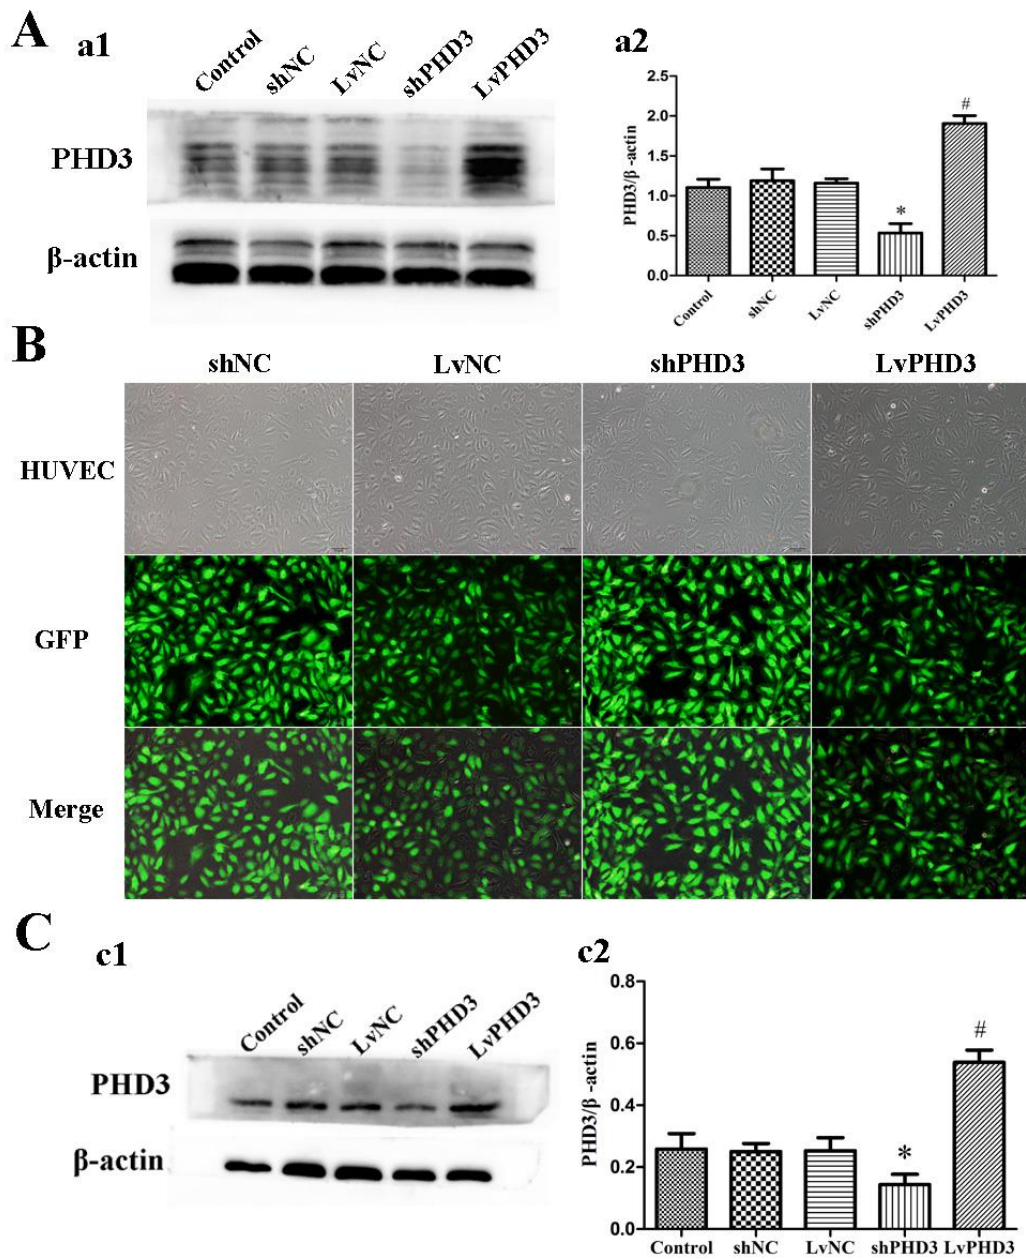

Figure S3.

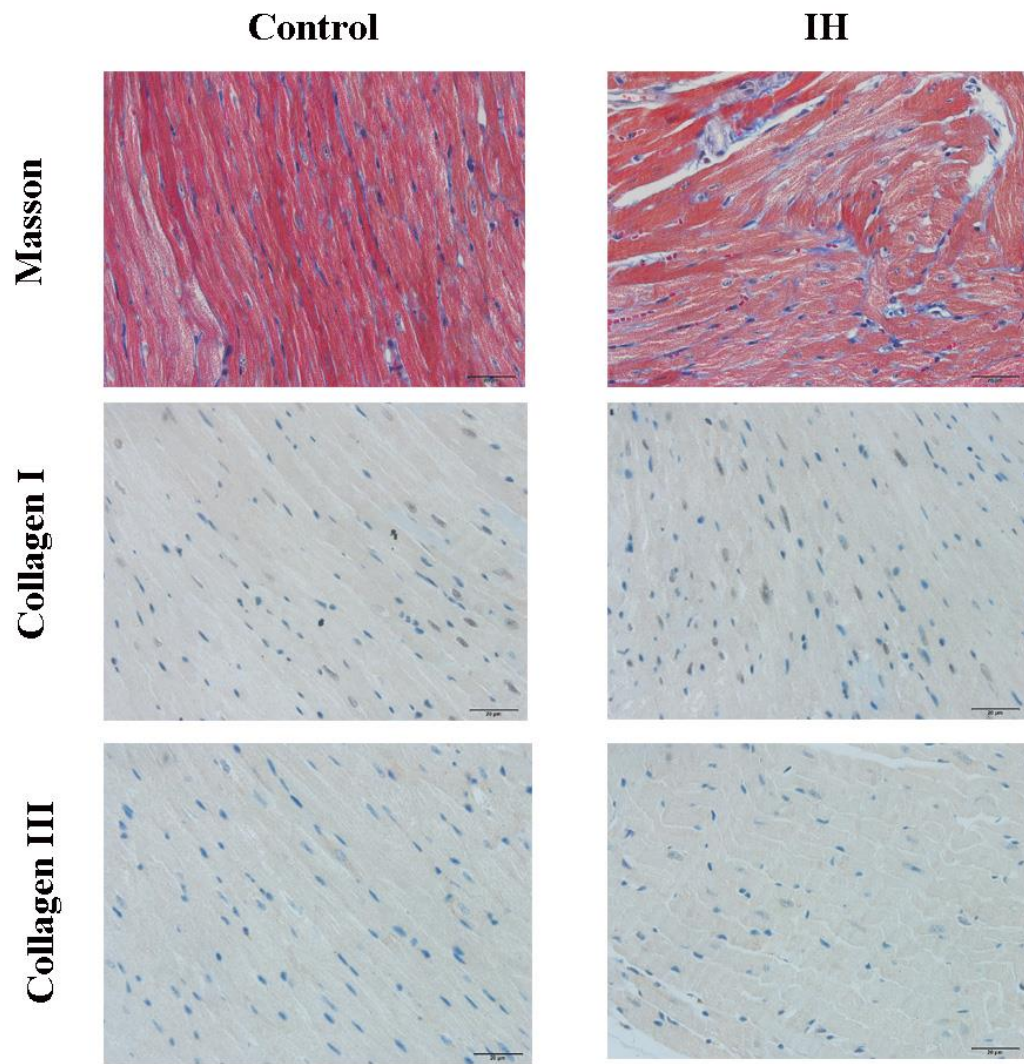



**Figure S4.**

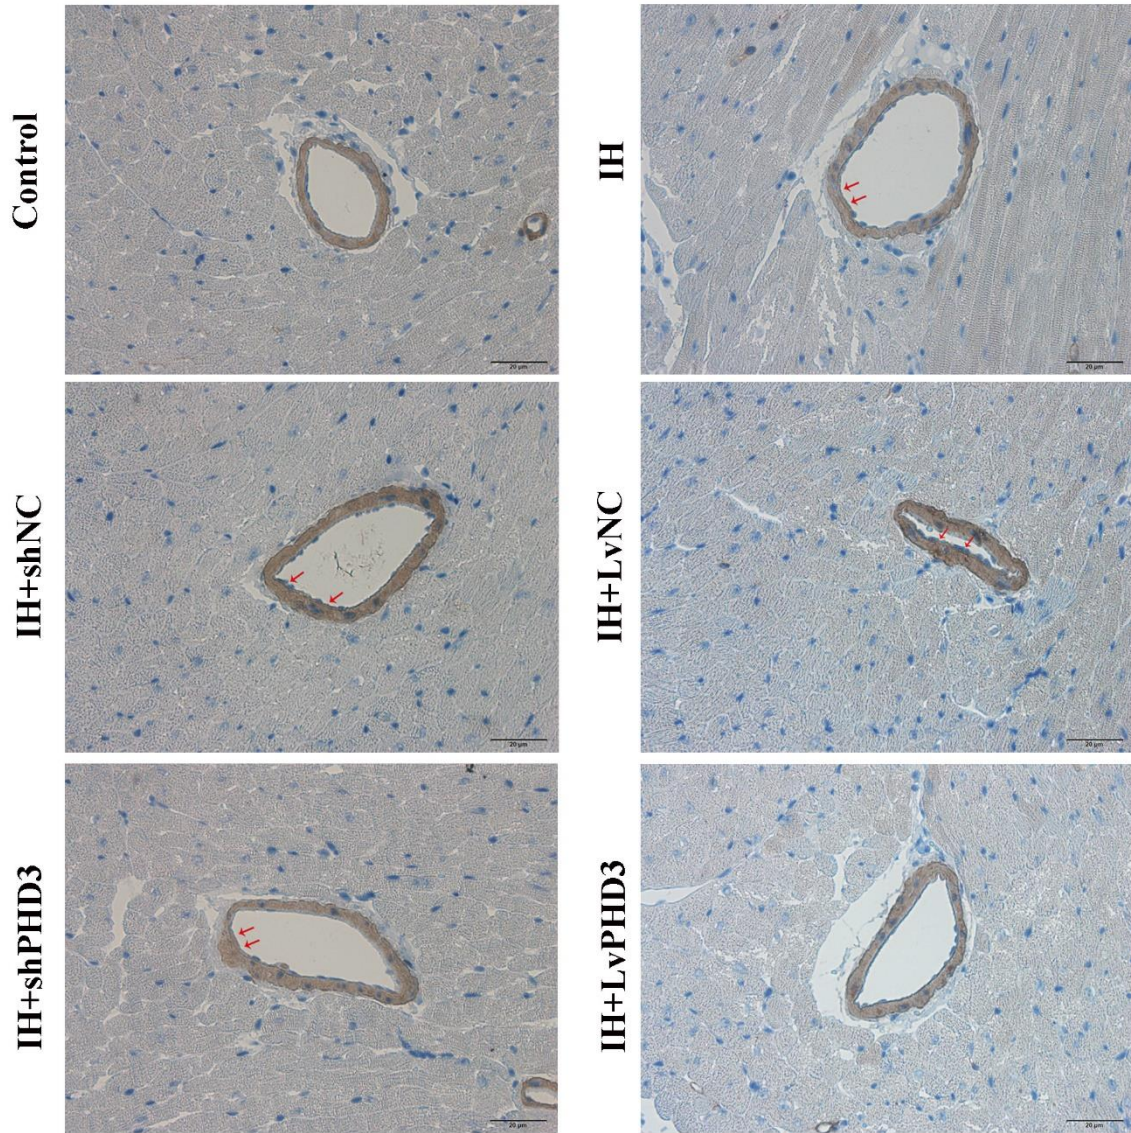

Supplement: JAH3-6-e006680-s001.pdf [file JAH3-6-e006680-s001.pdf]
